# Supplementary material for: Activity and Exercise Intolerance After Concussion: Identification and Management of Postural Orthostatic Tachycardia Syndrome
Source: PubMed Central journal article supplement — J Neurol Phys Ther. 2018 Jun 1;42(3):163–71. doi: 10.1097/NPT.0000000000000231 (PMC6023605; doi:10.1097/npt.0000000000000231), 2018-06-01
Supplement: jnpt-42-163-s002.pdf [file jnpt-42-163-s002.pdf]

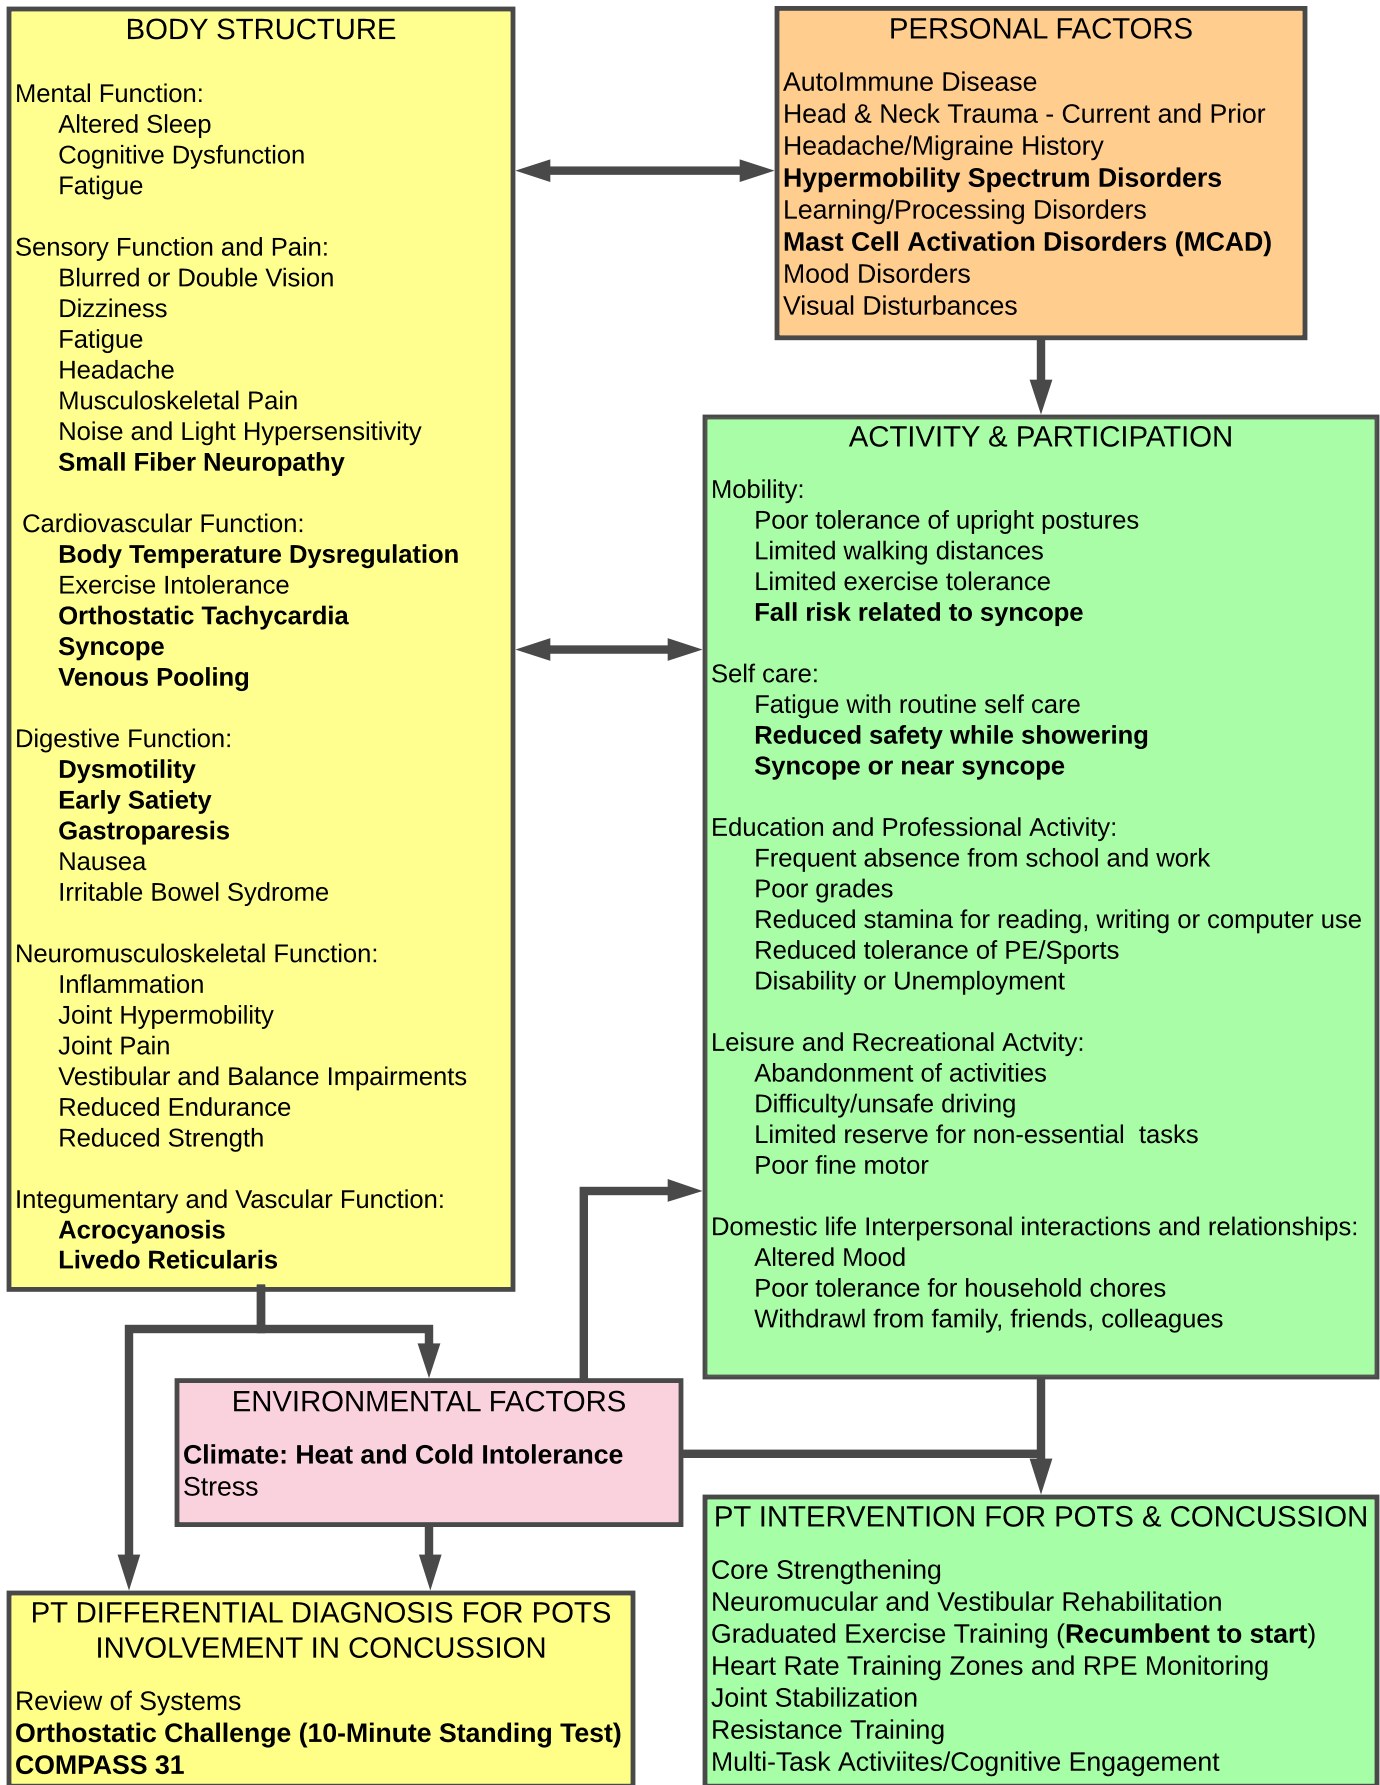

Proposed ICF Model for identification of features specific to postural orthostatic tachycardia syndrome (POTS) in individuals following concussion and whiplash injuries. Multiple similarities exist between affected body structures and activities. Bolded items indicate features specific to POTS for differential diagnosis and patient management (see references 27-29). Developed by Nicole Miranda, PT, DPT.
