# Supplementary material for: Activity and Exercise Intolerance After Concussion: Identification and Management of Postural Orthostatic Tachycardia Syndrome
Source: PubMed Central journal article supplement — J Neurol Phys Ther. 2018 Jun 1;42(3):163–71. doi: 10.1097/NPT.0000000000000231 (PMC6023605; doi:10.1097/npt.0000000000000231), 2018-06-01

APPENDIX 2

Recommendations for physical therapist assessment and management of POTS in people recovering from concussion or whiplash injuries. This algorithm introduces a proposed role for physical therapists to assess for the presence of POTS and perform regular reassessment of orthostatic intolerance in response to interventions. Developed by Nicole Miranda, PT, DPT

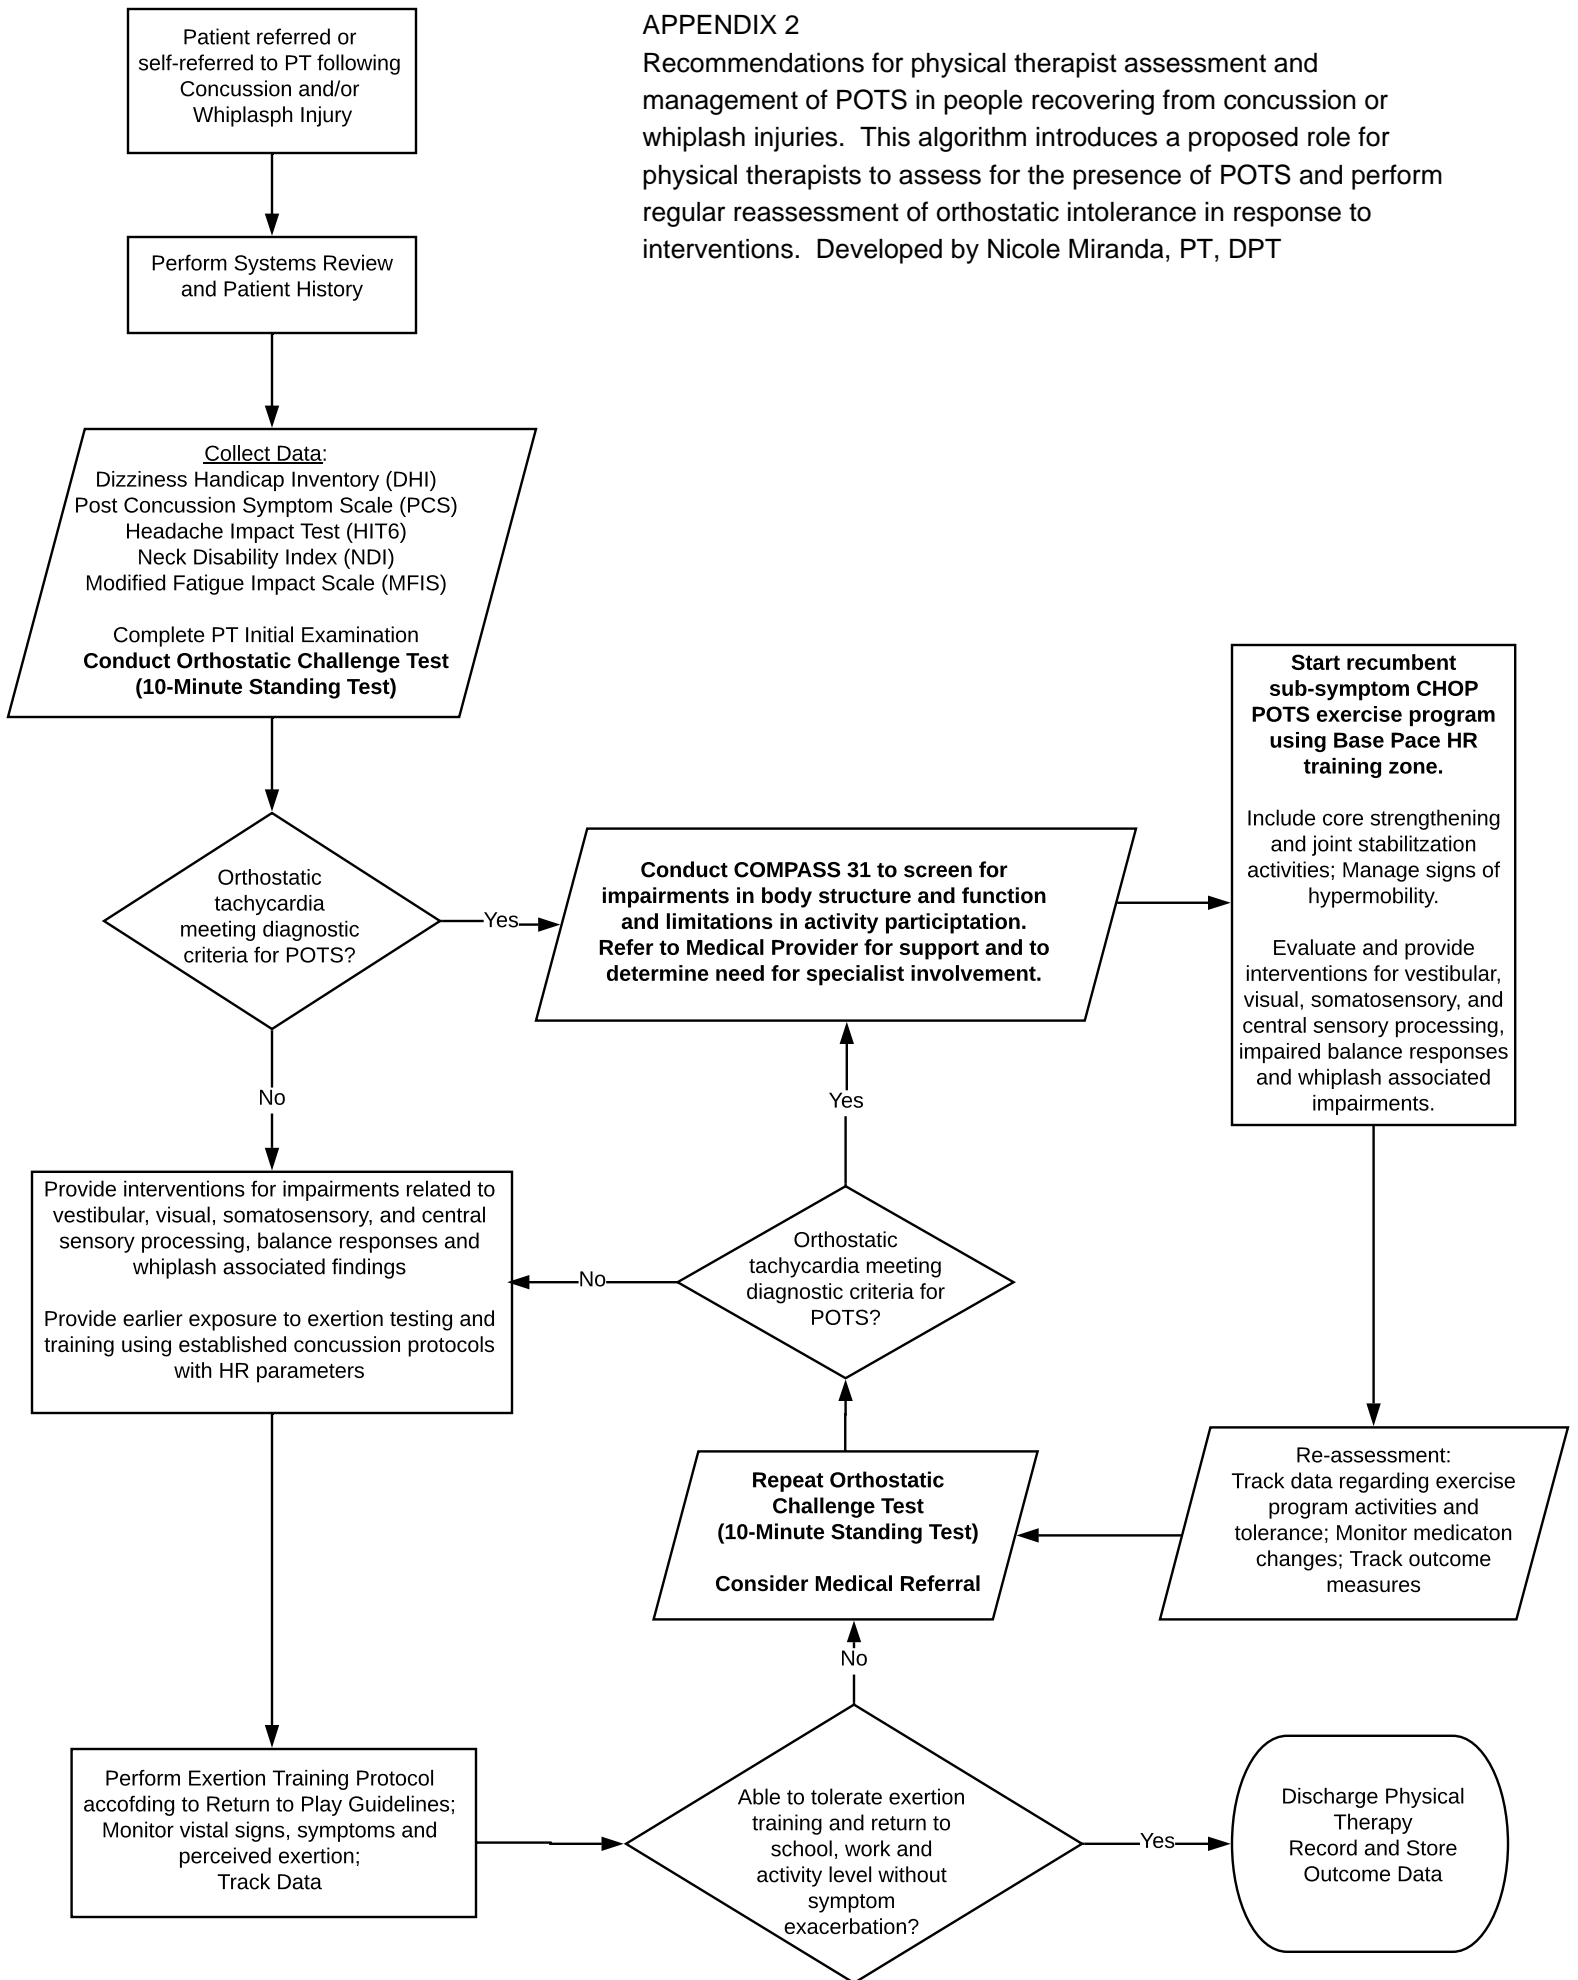

Supplement: jnpt-42-163-s003.pdf [file jnpt-42-163-s003.pdf]
